# Supplementary material
Source: PubMed Central journal article supplement (PMC3953419)
Supplement: NIHMS540655-supplement-01.pdf [file NIHMS540655-supplement-01.pdf]

## Supplemental Appendix Index

**Supplemental Table 1: Compilation of reports on recurrent medulloblastoma reporting the location of recurrence**

**Supplemental Table 2: Subgroup-specific median time to recurrence and survival post-recurrence across all three cohorts**

**Supplemental Table 3: Subgroup specific location of metastatic dissemination**

**Supplemental Table 4: Subgroup specific clinical characteristics by craniospinal irradiation at diagnosis for all 3 cohorts**

**Supplemental Table 5: Clinical characteristics by pattern of recurrence for all 3 cohorts**

**Supplemental Table 6: Treatment at diagnosis for all 3 cohorts**

**Supplemental Figure 1:** Principle component analysis of normalized nanoString gene expression data of tumour samples collected at diagnosis compared to matched recurrences according to the following subgroups: **A)** SHH, **B)** Group 3, and **C)** Group 4 and **D)** NMF consensus clustering of primary and recurrent medulloblastoma ( $k=3$ , cophenetic coefficient=1).

**Supplemental Figure 2:** Secondary high grade glioma in the tumour bed of a previously irradiated Group 4 patient. **A)** H&E staining at diagnosis showing densely packed sheets of small round nuclei with scant cytoplasm consistent with classic histology medulloblastoma. **B)** H&E staining at second surgery showing markedly different morphology with pleomorphic nuclei and more abundant cytoplasm consistent with a high grade glioma. **C)** Heatmap of relative gene expression of 22 nanoString probes normalized to three housekeeping genes (*ACTB*, *GAPDH*, *LDHA*) the sample in **A)** at diagnosis, and **B)** at second surgery. Relative gene expression is plotted on a blue-red gradient where red indicates high expression and blue low expression. Note the paucity of Group 4 markers in the sample from second surgery

**Supplemental Figure 3:** Subgroup specific recurrence free survival across three non-overlapping cohorts of recurrent medulloblastoma. Kaplan Meier Survival estimates of recurrence free survival for the **A)** Discovery Cohort, **B)** Validation Cohort 1, and **C)** Validation Cohort 2. p-values were determined using the generalized Wilcoxon test across the three subgroups.

**Supplemental Figure 4:** Median overall survival post-recurrence for all recurrent medulloblastoma. Kaplan Meier Survival estimates of survival post-recurrence for the **A)** Discovery Cohort, **B)** Validation Cohort 1 and **C)** Validation Cohort 2.

**Supplemental Figure 5:** Incidence of metastatic recurrences across medulloblastoma subgroups. Stacked column graph of local vs. metastatic recurrences in the three subgroups across all three cohorts. P-values determined by the Fisher's exact test. Solid areas of the graph represent local recurrence, and diagonally striped areas represent metastatic recurrences.

**Supplemental Figure 6:** Pattern of recurrence stratified by treatment across medulloblastoma subgroups in Validation Cohort 1 and 2. Validation Cohort 1: **A)** SHH, **B)** Group 3, **C)** Group 4; Validation Cohort 2: **E)** SHH, **F)** Group 3, **G)** Group 4. p-values determined by the Fisher's exact test. Solid areas of the graph represent local tumour bed recurrence and diagonally striped areas represent metastatic recurrences. Note: Two patients in Validation Cohort 1 received focal RT with chemotherapy, one SHH with a metastatic recurrence and one Group 4 with a metastatic recurrence. Both cases are included in the chemotherapy only category.

**Supplemental Figure 7:** Pattern of recurrence stratified by age across SHH medulloblastomas in the **A)** Discovery Cohort, **B)** Validation Cohort 1, and **C)** Validation Cohort 2. p-values represent Fisher's exact test. p-values determined by the Fisher's exact test. Solid areas of the graph represent local tumour bed recurrence and diagonally striped areas represent metastatic only recurrence.

**Supplemental Table 1: Compilation of reports on recurrent medulloblastoma reporting the location of recurrence**

|                                              | Number of Recurrent Medulloblastoma | Clinical Annotation | Molecular Annotation | Matched Tissue from Diagnosis and Recurrence |
|----------------------------------------------|-------------------------------------|---------------------|----------------------|----------------------------------------------|
| Current Study 2013                           | 203                                 | ✓                   | ✓                    | ✓                                            |
| Tarbell et al. 2013 <sup>1</sup>             | 19                                  | ✓                   |                      |                                              |
| Friedrich et al, 2013 <sup>2</sup>           | 18                                  | ✓                   |                      |                                              |
| Lannering et al. 2012 <sup>3</sup>           | 66                                  | ✓                   |                      |                                              |
| Pizer et al. 2011 <sup>4</sup>               | 40                                  | ✓                   |                      |                                              |
| Dunkel et al. 2010 <sup>5</sup>              | 25                                  | ✓                   |                      |                                              |
| Chargari et al. 2010 <sup>6</sup>            | 19                                  | ✓                   |                      |                                              |
| Srikantha et al. 2010 <sup>7</sup>           | 33                                  | ✓                   |                      |                                              |
| Warmuth-Metz et al. 2010 <sup>8</sup>        | 40                                  | ✓                   |                      |                                              |
| von Hoff et al, 2009 <sup>9</sup>            | 107                                 | ✓                   |                      |                                              |
| Riffaud et al. 2009 <sup>10</sup>            | 11                                  | ✓                   |                      |                                              |
| Massimino et al. 2009 <sup>11</sup>          | 17                                  | ✓                   |                      |                                              |
| Gandala et al. 2008 <sup>12</sup>            | 8                                   | ✓                   |                      |                                              |
| Gururangan et al. 2008 <sup>13</sup>         | 30                                  | ✓                   |                      |                                              |
| Korshunov et al. 2008 <sup>14</sup>          | 28                                  |                     | ✓                    | ✓                                            |
| Padovani et al. 2007 <sup>15</sup>           | 74                                  | ✓                   |                      |                                              |
| Bowers et al. 2007 <sup>16</sup>             | 46                                  | ✓                   |                      |                                              |
| Abe et al. 2006 <sup>17</sup>                | 12                                  | ✓                   |                      |                                              |
| Paulino et al. 2006 <sup>18</sup>            | 31                                  | ✓                   |                      |                                              |
| Tabori et al. 2006 <sup>19</sup>             | 22                                  | ✓                   |                      |                                              |
| Gajjar et al. 2006 <sup>20</sup>             | 26                                  | ✓                   |                      |                                              |
| Packer et al. 2006 <sup>21</sup>             | 62                                  | ✓                   |                      |                                              |
| Grill et al. 2005 <sup>22</sup>              | 51                                  | ✓                   |                      |                                              |
| Rutkowski et al. 2005 <sup>23</sup>          | 9                                   | ✓                   |                      |                                              |
| Herrlinger et al. 2005 <sup>24</sup>         | 12                                  | ✓                   |                      |                                              |
| Oyharcabal-Bourden et al. 2005 <sup>25</sup> | 47                                  | ✓                   |                      |                                              |
| Saunders et al. 2003 <sup>26</sup>           | 53                                  | ✓                   |                      |                                              |
| Taylor et al. 2003 <sup>27</sup>             | 56                                  | ✓                   |                      |                                              |
| Yalcin et al. 2002 <sup>28</sup>             | 31                                  | ✓                   |                      |                                              |
| Chan et al. 2000 <sup>29</sup>               | 17                                  | ✓                   |                      |                                              |
| Bouffet et al, 1998 <sup>30</sup>            | 46                                  | ✓                   |                      |                                              |
| Prados et al. 1995 <sup>31</sup>             | 22                                  | ✓                   |                      |                                              |
| Frost et al. 1995 <sup>32</sup>              | 24                                  | ✓                   |                      |                                              |
| Torres et al. 1994 <sup>33</sup>             | 23                                  | ✓                   |                      |                                              |
| Wara et al. 1994 <sup>34</sup>               | 54                                  | ✓                   |                      |                                              |

|                                          |    |   |  |  |
|------------------------------------------|----|---|--|--|
| Belza et al. 1991 <sup>35</sup>          | 36 | ✓ |  |  |
| Silverman and Simpson 1982 <sup>36</sup> | 31 | ✓ |  |  |

References:

1. Tarbell NJ, Friedman H, Polkinghorn WR, et al. High-Risk Medulloblastoma: A Pediatric Oncology Group Randomized Trial of Chemotherapy Before or After Radiation Therapy (POG 9031). *J Clin Oncol* 2013.
2. Friedrich C, von Bueren AO, von Hoff K, et al. Treatment of adult nonmetastatic medulloblastoma patients according to the paediatric HIT 2000 protocol: a prospective observational multicentre study. *Eur J Cancer* 2013; **49**(4): 893-903.
3. Lannering B, Rutkowski S, Doz F, et al. Hyperfractionated versus conventional radiotherapy followed by chemotherapy in standard-risk medulloblastoma: results from the randomized multicenter HIT-SIOP PNET 4 trial. *J Clin Oncol* 2012; **30**(26): 3187-93.
4. Pizer B, Donachie PHJ, Robinson K, et al. Treatment of recurrent central nervous system primitive neuroectodermal tumours in children and adolescents: Results of a Childrens Cancer and Leukaemia Group study. *Eur J Cancer* 2011; **47**(9): 1389-97.
5. Dunkel IJ, Gardner SL, Garvin JH, Goldman S, Shi W, Finlay JL. High-dose carboplatin, thiotepa, and etoposide with autologous stem cell rescue for patients with previously irradiated recurrent medulloblastoma. *Neuro-Oncology* 2010; **12**(3): 297-303.
6. Chargari C, Feuvret L, Levy A, et al. Reappraisal of clinical outcome in adult medulloblastomas with emphasis on patterns of relapse. *Br J Neurosurg* 2010; **24**(4): 460-7.
7. Srikantha U, Balasubramaniam A, Santosh V, Somanna S, Bhagavatula ID, Ashwathnarayana CB. Recurrence in medulloblastoma - influence of clinical, histological and immunohistochemical factors. *Br J Neurosurg* 2010; **24**(3): 280-8.
8. Warmuth-Metz M, Blashofer S, Bueren AO, et al. Recurrence in childhood medulloblastoma. *J Neurooncol* 2010; **103**(3): 705-11.
9. von Hoff K, Hinkes B, Gerber NU, et al. Long-term outcome and clinical prognostic factors in children with medulloblastoma treated in the prospective randomised multicentre trial HIT'91. *Eur J Cancer* 2009; **45**(7): 1209-17.
10. Riffaud L, Saikali S, Leray E, et al. Survival and prognostic factors in a series of adults with medulloblastomas. *J Neurosurg* 2009; **111**(3): 478-87.
11. Massimino M, Gandola L, Spreafico F, et al. No Salvage Using High-Dose Chemotherapy Plus/Minus Reirradiation for Relapsing Previously Irradiated Medulloblastoma. *Radiation Oncology Biology* 2009; **73**(5): 1358-63.
12. Gandola L, Massimino M, Cefalo G, et al. Hyperfractionated Accelerated Radiotherapy in the Milan Strategy for Metastatic Medulloblastoma. *Journal of Clinical Oncology* 2008; **27**(4): 566-71.
13. Gururangan S, Krauser J, Watral MA, et al. Efficacy of high-dose chemotherapy or standard salvage therapy in patients with recurrent medulloblastoma. *Neuro Oncol* 2008; **10**(5): 745-51.
14. Korshunov A, Benner A, Remke M, Lichter P, Deimling A, Pfister S. Accumulation of genomic aberrations during clinical progression of medulloblastoma. *Acta Neuropathol* 2008; **116**(4): 383-90.
15. Padovani L, Sunyach MP, Perol D, et al. Common strategy for adult and pediatric medulloblastoma: a multicenter series of 253 adults. *Int J Radiat Oncol Biol Phys* 2007; **68**(2): 433-40.
16. Bowers DC, Gargan L, Weprin BE, et al. Impact of site of tumor recurrence upon survival for children with recurrent or progressive medulloblastoma. *J Neurosurg* 2007; **107**(1 Suppl): 5-10.
17. Abe M, Tokumaru S, Tabuchi K, Kida Y, Takagi M, Imamura J. Stereotactic Radiation Therapy with Chemotherapy in the Management of Recurrent Medulloblastomas. *Pediatr Neurosurg* 2006; **42**(2): 81-8.
18. Paulino AC. Collins' law revisited: can we reliably predict the time to recurrence in common pediatric tumors? *Pediatr Hematol Oncol* 2006; **23**(1): 81-6.
19. Tabori U, Sung L, Hukin J, et al. Distinctive clinical course and pattern of relapse in adolescents with medulloblastoma. *Int J Radiat Oncol Biol Phys* 2006; **64**(2): 402-7.
20. Gajjar A, Chintagumpala M, Ashley D, et al. Risk-adapted craniospinal radiotherapy followed by high-dose chemotherapy and stem-cell rescue in children with newly diagnosed medulloblastoma (St Jude

- Medulloblastoma-96): long-term results from a prospective, multicentre trial. *Lancet Oncol* 2006; **7**(10): 813-20.
21. Packer RJ, Gajjar A, Vezina G, et al. Phase III study of craniospinal radiation therapy followed by adjuvant chemotherapy for newly diagnosed average-risk medulloblastoma. *J Clin Oncol* 2006; **24**(25): 4202-8.
  22. Grill J, Sainte-Rose C, Jouvet A, et al. Treatment of medulloblastoma with postoperative chemotherapy alone: an SFOP prospective trial in young children. *Lancet Oncol* 2005; **6**(8): 573-80.
  23. Rutkowski S, Bode U, Deinlein F, et al. Treatment of early childhood medulloblastoma by postoperative chemotherapy alone. *N Engl J Med* 2005; **352**(10): 978-86.
  24. Herrlinger U, Steinbrecher A, Rieger J, et al. Adult medulloblastoma. *Prognostic factors and response to therapy at diagnosis and at relapse* 2005; **252**(3): 291-9.
  25. Oyharcabal-Bourden V, Kalifa C, Gentet JC, et al. Standard-risk medulloblastoma treated by adjuvant chemotherapy followed by reduced-dose craniospinal radiation therapy: a French Society of Pediatric Oncology Study. *J Clin Oncol* 2005; **23**(21): 4726-34.
  26. Saunders DE, Hayward RD, Phipps KP, Chong WK, Wade AM. Surveillance neuroimaging of intracranial medulloblastoma in children: how effective, how often, and for how long? *J Neurosurg* 2003; **99**(2): 280-6.
  27. Taylor RE. Results of a Randomized Study of Preradiation Chemotherapy Versus Radiotherapy Alone for Nonmetastatic Medulloblastoma: The International Society of Paediatric Oncology/United Kingdom Children's Cancer Study Group PNET-3 Study. *Journal of Clinical Oncology* 2003; **21**(8): 1581-91.
  28. Yalcin B, Buyukpamukcu M, Akalan N, Cila A, Kutluk MT, Akyuz C. Value of surveillance imaging in the management of medulloblastoma. *Med Pediatr Oncol* 2002; **38**(2): 91-7.
  29. Chan AW, Tarbell NJ, Black PM, et al. Adult medulloblastoma: prognostic factors and patterns of relapse. *Neurosurgery* 2000; **47**(3): 623-31; discussion 31-2.
  30. Bouffet E, Doz F, Demaille MC, et al. Improving survival in recurrent medulloblastoma: earlier detection, better treatment or still an impasse? *Br J Cancer* 1998; **77**(8): 1321-6.
  31. Prados MD, Warnick RE, Wara WM, Larson DA, Lamborn K, Wilson CB. Medulloblastoma in adults. *Int J Radiat Oncol Biol Phys* 1995; **32**(4): 1145-52.
  32. Frost PJ, Laperriere NJ, Wong CS, Milosevic MF, Simpson WJ, Pintilie M. Medulloblastoma in adults. *Int J Radiat Oncol Biol Phys* 1995; **32**(4): 951-7.
  33. Torres CF, Rebsamen S, Silber JH, et al. Surveillance scanning of children with medulloblastoma. *N Engl J Med* 1994; **330**(13): 892-5.
  34. Wara WMW, Le QTQ, Sneed PKP, et al. Pattern of recurrence of medulloblastoma after low-dose craniospinal radiotherapy. 1994; **30**(3): 551-6.
  35. Belza MG, Donaldson SS, Steinberg GK, Cox RS, Cogen PH. Medulloblastoma: freedom from relapse longer than 8 years--a therapeutic cure? *J Neurosurg* 1991; **75**(4): 575-82.
  36. Silverman CL, Simpson JR. Cerebellar medulloblastoma: the importance of posterior fossa dose to survival and patterns of failure. *Int J Radiat Oncol Biol Phys* 1982; **8**(11): 1869-76.



**Supplemental Table 2: Subgroup-specific median time to recurrence and survival post-recurrence across all three cohorts**

|                                                  | Discovery Cohort     | Validation Cohort 1 | Validation Cohort 2  | p-value        |
|--------------------------------------------------|----------------------|---------------------|----------------------|----------------|
| <i>Time to Recurrence (years + 95% CI)</i>       |                      |                     |                      |                |
| <b>All Subgroups</b>                             | 1.49 (95% 1.09-1.9)  | 1.65 (95% 1.3-2.0)  | 1 (95% 0.91-1.09)    | <b>0.0038</b>  |
| <b>SHH</b>                                       | 0.96 (95% 0.85-1.08) | 1.34 (95% 0.8-1.9)  | 1 (95% 0.81-1.19)    | 0.58           |
| <b>Group 3</b>                                   | 1.5 (95% 0.3-2)      | 1.1 (95% 0.6-1.6)   | 0.92 (95% 0.78-1.06) | 0.36           |
| <b>Group 4</b>                                   | 3.9 (95% 3.3-4.5)    | 2.18 (95% 1.5-2.8)  | 1.17 (95% 0.68-1.66) | <b>0.00018</b> |
| <i>Survival post-recurrence (years + 95% CI)</i> |                      |                     |                      |                |
| <b>All Subgroups</b>                             | 0.63 (95% 0.1-39)    | 1.68 (95% 0.8-2.6)  | 1.67 (95% 0.65-2.7)  | <b>0.11</b>    |
| <b>SHH</b>                                       | 0.14 (95% 0.08-0.2)  | 0.98 (95% 0.8-1.4)  | 0.92 (95% 0.04-1.8)  | <b>0.0025</b>  |
| <b>Group 3</b>                                   | 0.3 (95% 0.14-0.42)  | 1.1 (95% 0.2-7)     | 1.75 (95% 0.47-3.03) | <b>0.023</b>   |
| <b>Group 4</b>                                   | 2.14 (95% 0.99-3.29) | 3.7 (95% 2.5-5)     | 1.75 (95% 0.5-3)     | 0.89           |

Times to recurrence reported as Years (95% confidence intervals). p-values for time to recurrence are calculated using the generalized Wilcoxon test and p-values for survival post-recurrence are calculated using the log-rank method.

**Supplemental Table 3: Subgroup Specific Location of Metastatic Dissemination**

|                                        | SHH | Group 3 | Group 4 | p-value |
|----------------------------------------|-----|---------|---------|---------|
| <b><i>Toronto Discovery Cohort</i></b> |     |         |         | 0.17    |
| Diffuse Leptomeningeal                 | 2   | 5       | 2       |         |
| Isolated Supratentorial Metastatic     | 0   | 1       | 6       |         |
| Spine Only                             | 0   | 1       | 0       |         |
| Tumour Bed + Metastatic                | 1   | 1       | 1       |         |
| <b><i>Validation Cohort</i></b>        |     |         |         | 0.60    |
| Diffuse Leptomeningeal                 | 4   | 2       | 6       |         |
| Isolated Supratentorial Metastatic     | 1   | 5       | 7       |         |
| Spine Only                             | 2   | 3       | 5       |         |
| Tumour Bed + Metastatic                | 2   | 2       | 2       |         |
| Extraneural                            | 1   | 2       | 0       |         |
| <b><i>DKFZ Validation Cohort</i></b>   |     |         |         | 0.37    |
| Metastatic                             | 1   | 26      | 22      |         |
| Tumour Bed + Metastatic                | 2   | 10      | 11      |         |

**Supplemental Table 4: Subgroup specific clinical Characteristics by craniospinal irradiation at diagnosis for all 3 cohorts**

|                       | Chemo Only    | CSI +          | p-value       |
|-----------------------|---------------|----------------|---------------|
| <b>WNT</b>            | 0             | 3              |               |
| Male Gender           |               | 2 (66%)        |               |
| Age (years)           |               | 10 (6·5-11)    |               |
| Histology             |               |                |               |
| Classic               |               | 3              |               |
| M+ at Diagnosis       |               | 0              |               |
| Incomplete Resection  |               | 0              |               |
| Pattern of Recurrence |               |                |               |
| Local                 |               | 1              |               |
| Metastatic            |               | 2              |               |
| <b>SHH</b>            | 20            | 38             |               |
| Male Gender           | 12 (63%)      | 12 (39%)       | 0·15          |
| Age (years)           | 2 (1·4-2·5)   | 12 (7·2-18·4)* | <0·0001       |
| Histology             |               |                | 0·051         |
| LCA                   | 1 (5·6%)      | 9 (27%)        |               |
| Classic               | 7 (39%)       | 17 (50%)       |               |
| Desmoplastic          | 10 (56%)      | 8 (23%)        |               |
| M+ at Diagnosis       | 4 (20%)       | 6 (19%)        | 1             |
| Incomplete Resection  | 3 (21%)       | 7 (28%)        | 0·72          |
| Pattern of Recurrence |               |                | 1             |
| Local                 | 14 (70%)      | 26 (68%)       |               |
| Metastatic            | 6 (30%)       | 12 (32%)       |               |
| <b>Group 3</b>        | 20            | 47             |               |
| Male Gender           | 11 (61%)      | 36 (78%)       | 0·21          |
| Age (years)           | 3 (2·2-3·3)   | 6 (4·2-10)     | <0·0001       |
| Histology             |               |                | 0·54          |
| LCA                   | 7 (35%)       | 21 (46%)       |               |
| Classic               | 12 (60%)      | 24 (52%)       |               |
| Desmoplastic          | 1 (5%)        | 1 (2%)         |               |
| M+ at diagnosis       | 12 (60%)      | 23 (52%)       | 0·60          |
| Incomplete Resection  | 5 (33%)       | 13 (34%)       | 1             |
| Pattern of Recurrence |               |                | 0·6           |
| Local                 | 2 (10%)       | 4 (9%)         |               |
| Metastatic            | 18 (90%)      | 43 (92%)       |               |
| <b>Group 4</b>        | 9             | 58             |               |
| Male Gender           | 5 (57%)       | 41 (75%)       | 0·41          |
| Age (years)           | 4·9 (3·4-5·4) | 9 (7-11)       | <0·0001       |
| Histology             |               |                | 1             |
| LCA                   | 1 (20%)       | 10 (19%)       |               |
| Classic               | 4 (80%)       | 43 (80%)       |               |
| Desmoplastic          | 0             | 1 (2%)         |               |
| M+ at diagnosis       | 1 (11%)       | 22 (41%)       | 0·24          |
| Incomplete Resection  | 1 (33%)       | 17 (35%)       | 1             |
| Pattern of Recurrence |               |                | <b>0·032*</b> |
| Local Only            | 3 (38·5%)     | 4 (6·8%)       |               |
| Metastatic            | 5 (62·5%)     | 55 (93·2%)     |               |

p-values – Fisher exact test for categorical variables and Mann-Whitney U test for continuous variables. Age represented by median (IQR). \*p<0·05 considered significant. Percentages are within columns. LCA=Large Cell/Anaplastic Histology

Notes: \*One infant received 18Gy CSI at diagnosis.

Gender missing in 24 cases; Histology missing in 23 cases; M+ Dissemination at diagnosis missing in 22 cases; Extent of Resection missing in 56 cases;

**Supplemental Table 5: Clinical Characteristics by pattern of recurrence for all three cohorts**

|                        | Local Recurrence | Metastatic Recurrence | p-value        |
|------------------------|------------------|-----------------------|----------------|
| <b>WNT</b>             | 1                | 2                     |                |
| Male Gender            | 1                | 1 (50%)               |                |
| Age                    | 10, 11           | 6-5                   |                |
| Histology              |                  |                       |                |
| Classic                | 1                | 2                     |                |
| M+ at Diagnosis        | 0                | 0 (0%)                |                |
| Incomplete Resection   | 0                | 0 (0%)                |                |
| Treatment at Diagnosis |                  |                       |                |
| Chemo Only             | 0                | 0                     |                |
| RT +/- Chemo           | 1                | 2                     |                |
| <b>SHH</b>             | 44               | 18                    |                |
| Male Gender            | 17 (46%)         | 7 (50%)               | 1              |
| Age                    | 8·04 (2·3-16·8)  | 6·1 (2·4-15·4)        | 0·98           |
| Histology              |                  |                       | 0·12           |
| LCA                    | 6 (16%)          | 5 (31%)               |                |
| Classic                | 21 (55%)         | 4 (25%)               |                |
| Desmoplastic           | 11 (29%)         | 7 (44%)               |                |
| M+ at Diagnosis        | 6 (16%)          | 3 (33%)               | 0·25           |
| Incomplete Resection   | 8 (28%)          | 2 (20%)               | 1              |
| Treatment at Diagnosis |                  |                       | 1              |
| Chemo Only             | 14 (35%)         | 6 (29%)               |                |
| RT +/- Chemo           | 26 (65%)         | 12 (71%)              |                |
| <b>Group 3</b>         | 6                | 62                    |                |
| Male Gender            | 5 (83%)          | 43 (73%)              | 1              |
| Age                    | 6·3 (3·1-10·5)   | 4·6 (3·2-7·1)         | 0·64           |
| Histology              |                  |                       | 0·36           |
| LCA                    | 1 (17%)          | 27 (42%)              |                |
| Classic                | 5 (83%)          | 32 (54%)              |                |
| Desmoplastic           | 0                | 2 (3%)                |                |
| M+ at diagnosis        | 0                | 36 (61%)              | <b>0·0058*</b> |
| Incomplete Resection   | 1 (25%)          | 17 (33%)              | 1              |
| Treatment at Diagnosis |                  |                       | 1              |
| Chemo Only             | 2 (33%)          | 18 (29%)              |                |
| RT +/- Chemo           | 4 (67%)          | 43 (71%)              |                |
| <b>Group 4</b>         | 7                | 63                    |                |
| Male Gender            | 5 (83%)          | 41 (72%)              | 1              |
| Age                    | 5 (4-10)         | 8 (6·2-11)            | 0·35           |
| Histology              |                  |                       | 1              |
| LCA                    | 1 (20%)          | 10 (18%)              |                |
| Classic                | 4 (80%)          | 46 (80%)              |                |
| Desmoplastic           | 0                | 1 (2%)                |                |
| M+ at diagnosis        | 0                | 24 (42%)              | <b>0·039*</b>  |
| Incomplete Resection   | 2 (67%)          | 16 (39%)              | 0·27           |
| Treatment at Diagnosis |                  |                       | <b>0·032*</b>  |
| Chemo Only             | 3 (43%)          | 5 (8%)                |                |
| RT +/- Chemo           | 4 (57%)          | 55 (92%)              |                |

p-values – Fisher exact test for categorical variables and Mann-Whitney U test for continuous variables. Age represented by median (IQR).

\*p<0·05 considered significant. Percentages are within columns.

CSI=craniospinal irradiation. LCA=Large Cell/Anaplastic Histology

**Supplemental Table 6: Treatment at diagnosis for all three cohorts**

|                          | Local Recurrence | Metastatic Recurrence | p-value |
|--------------------------|------------------|-----------------------|---------|
| <b>WNT</b>               | 2                | 1                     | N/A     |
| <b>Chemo + RT</b>        | 2                | 1                     |         |
| <b>CSI Dose</b>          |                  |                       | N/A     |
| <b>18-24</b>             | 0                | 1                     |         |
| <b>36</b>                | 1                | 1                     |         |
| <b>SHH</b>               | 44               | 18                    |         |
| <b>Chemo Only</b>        | 14 (36%)         | 5 (28%)               | 0.53    |
| <b>Chemo + CSI</b>       | 21 (54%)         | 11 (61%)              |         |
| <b>CSI Only</b>          | 4 (10%)          | 1 (6%)                |         |
| <b>Chemo + Focal RT</b>  | 0                | 1 (6%)                |         |
| <b>Missing</b>           | 5                | 0                     |         |
| <b>CSI Dose</b>          |                  |                       | 0.44    |
| <b>0 Gy</b>              | 14 (38%)         | 6 (33%)               |         |
| <b>18-24 Gy</b>          | 4 (11%)          | 4 (27%)               |         |
| <b>36 Gy</b>             | 18 (50%)         | 6 (40%)               |         |
| <b>&gt;18Gy dose unk</b> | 3 <sup>a</sup>   | 2                     |         |
| <b>Group 3</b>           | 6                | 62                    |         |
| <b>Chemo Only</b>        | 2 (40%)          | 18 (30%)              | 0.67    |
| <b>Chemo + CSI</b>       | 3 (60%)          | 42 (69%)              |         |
| <b>CSI Only</b>          | 0                | 1 (2%)                |         |
| <b>Focal RT + Chemo</b>  | 0                | 0                     |         |
| <b>Missing</b>           | 1 <sup>b</sup>   | 1                     |         |
| <b>CSI Dose</b>          |                  |                       | 0.33    |
| <b>0 Gy</b>              | 2 (50%)          | 18 (32%)              |         |
| <b>18-24 Gy</b>          | 1 (25%)          | 6 (11%)               |         |
| <b>36 Gy</b>             | 1 (25%)          | 33 (57%)              |         |
| <b>&gt;18Gy dose unk</b> | 1                |                       |         |
| <b>Group 4</b>           | 7                | 63                    |         |
| <b>Chemo Only</b>        | 3 (43%)          | 3 (5%)                | 0.022*  |
| <b>Chemo + CSI</b>       | 4 (57%)          | 55 (93%)              |         |
| <b>CSI Only</b>          | 0                | 0                     |         |
| <b>Focal RT + Chemo</b>  | 0                | 1 (2%)                |         |
| <b>Missing</b>           | 0                | 4 <sup>c</sup>        |         |
| <b>CSI Dose</b>          |                  |                       | 0.014*  |
| <b>0 Gy</b>              | 3 (43%)          | 4 (7%)                |         |
| <b>18-24 Gy</b>          | 2 (29%)          | 12 (21%)              |         |
| <b>36 Gy</b>             | 2 (29%)          | 40 (71%)              |         |
| <b>&gt;18Gy dose unk</b> | 0                | 2                     |         |

p-values – Fishers exact test \*p<0.05 considered significant. Percentages are within columns. CSI=craniospinal irradiation. RT=Radiation Therapy. a-3 cases are known to have received CSI but dose and chemo unknown b- 1 case known to have received CSI but dose and chemo unknown c – 2 cases known to have received CSI but dose and chemo unknown

A

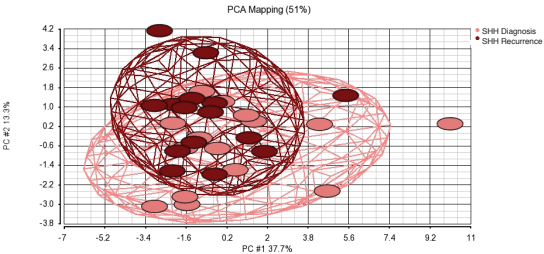

B

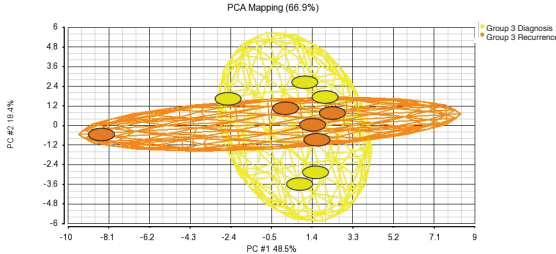

C

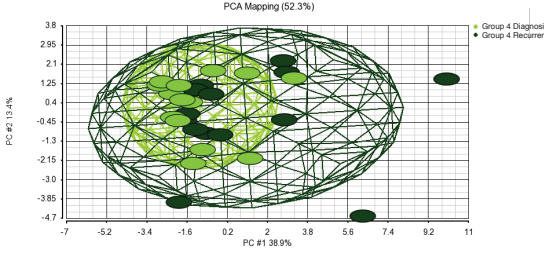

D

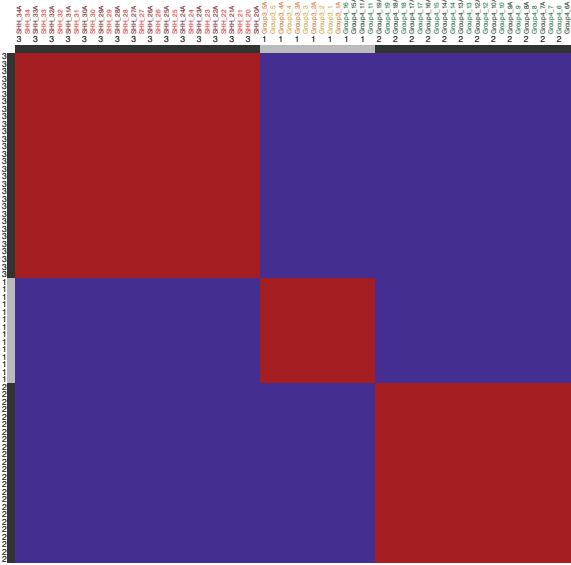



A

Discovery Cohort

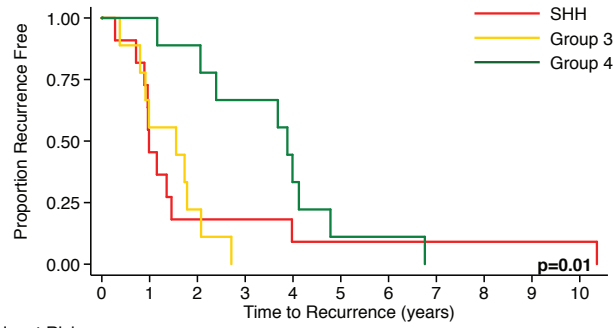

| No. at Risk | 0  | 1 | 2 | 3 | 4 | 5 | 6 | 7 | 8 | 9 | 10 |
|-------------|----|---|---|---|---|---|---|---|---|---|----|
| SHH         | 11 | 5 | 2 | 2 | 1 | 1 | 1 | 1 | 1 | 1 | 1  |
| Group 3     | 9  | 5 | 2 | 0 | 0 | 0 | 0 | 0 | 0 | 0 | 0  |
| Group 4     | 9  | 9 | 8 | 6 | 3 | 1 | 1 | 0 | 0 | 0 | 0  |

B

Validation Cohort 1 (Multicentre)

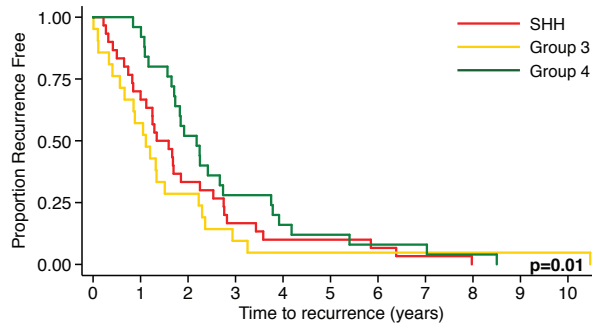

| No at risk. | 0  | 1  | 2  | 3 | 4 | 5 | 6 | 7 | 8 | 9 | 10 |
|-------------|----|----|----|---|---|---|---|---|---|---|----|
| SHH         | 30 | 21 | 10 | 5 | 3 | 3 | 2 | 1 | 0 | 0 | 0  |
| Group 3     | 21 | 12 | 6  | 2 | 1 | 1 | 1 | 1 | 1 | 1 | 1  |
| Group 4     | 25 | 24 | 13 | 7 | 4 | 3 | 2 | 2 | 1 | 0 | 0  |

C

Validation Cohort 2 (Burdenko)

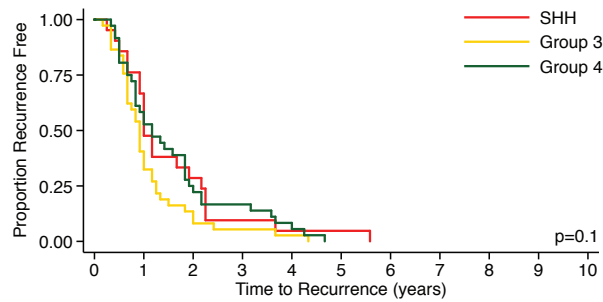

| No. at Risk | 0  | 1  | 2 | 3 | 4 | 5 | 6 | 7 | 8 | 9 | 10 |
|-------------|----|----|---|---|---|---|---|---|---|---|----|
| SHH         | 21 | 14 | 6 | 2 | 1 | 1 | 0 | 0 | 0 | 0 | 0  |
| Group 3     | 37 | 15 | 5 | 2 | 1 | 0 | 0 | 0 | 0 | 0 | 0  |
| Group 4     | 36 | 21 | 9 | 6 | 3 | 0 | 0 | 0 | 0 | 0 | 0  |



### Discovery Cohort

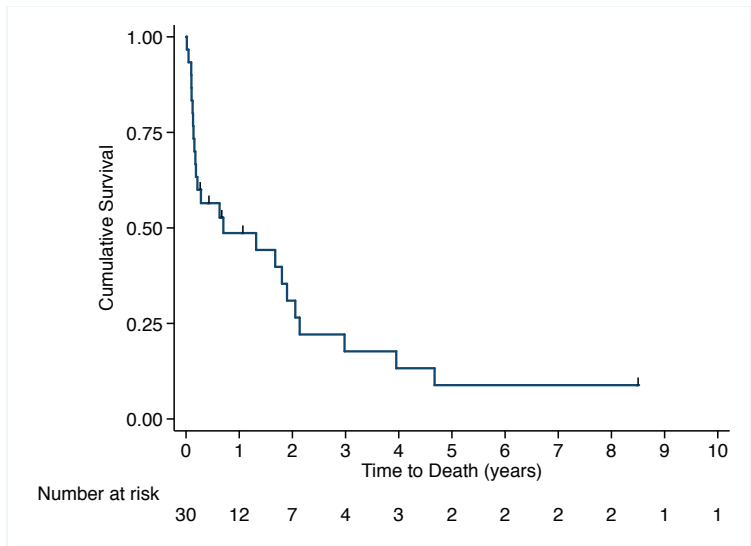

### Validation Cohort 1 (Multicentre)

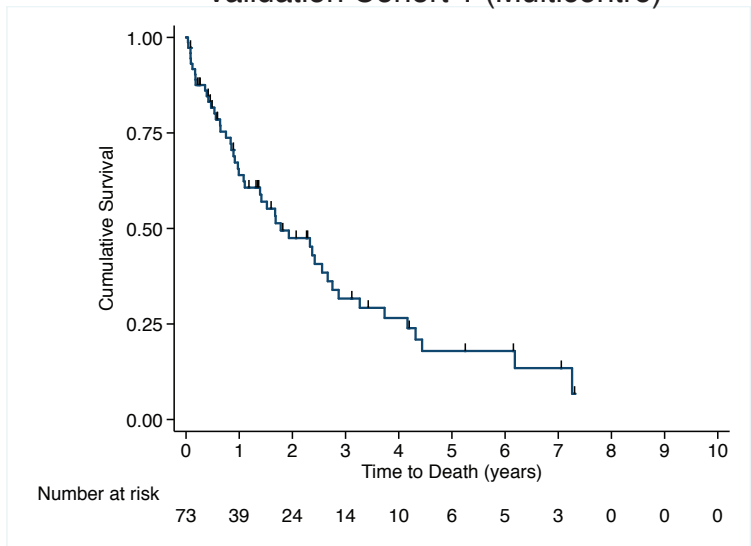

### Validation Cohort 2 (Burdenko)

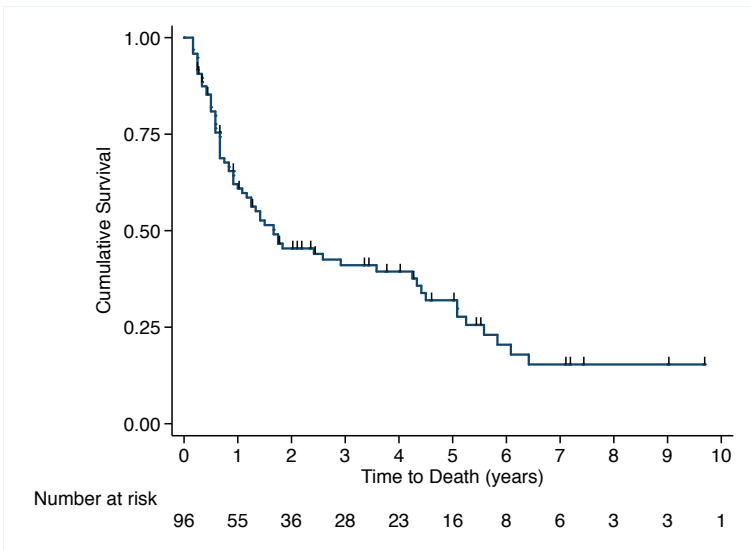

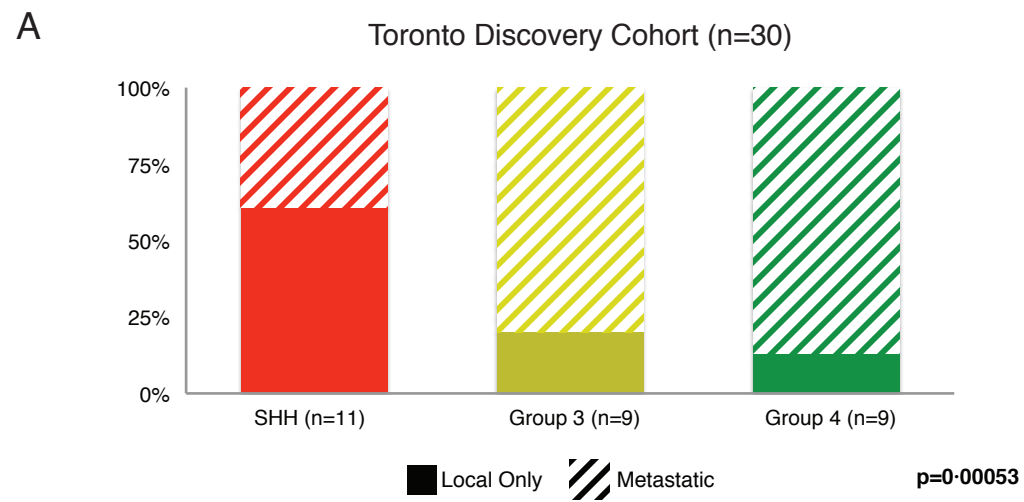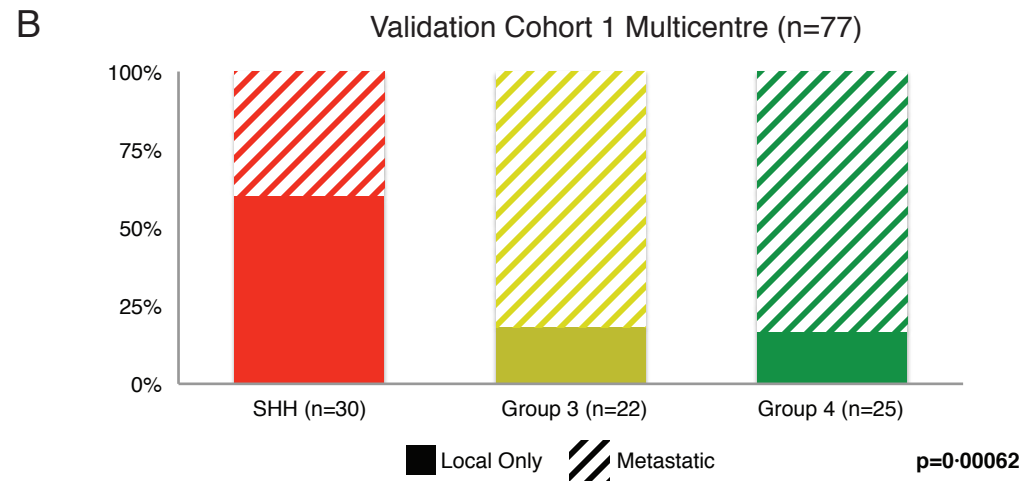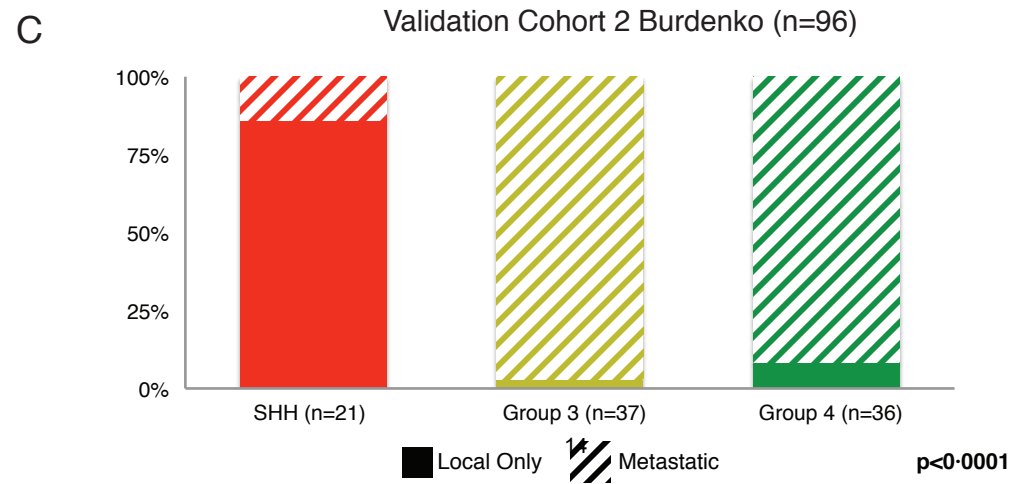

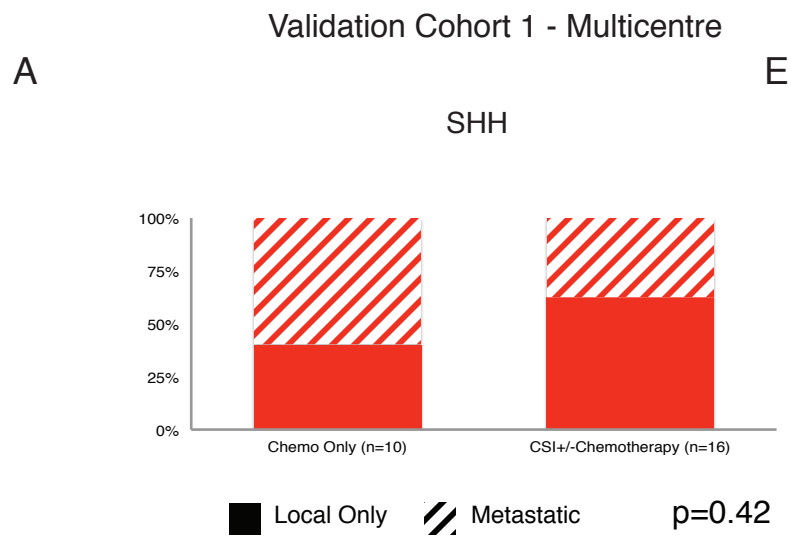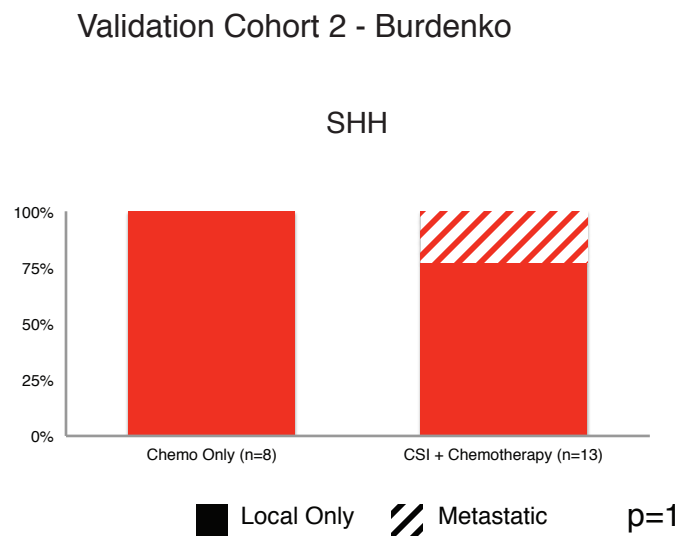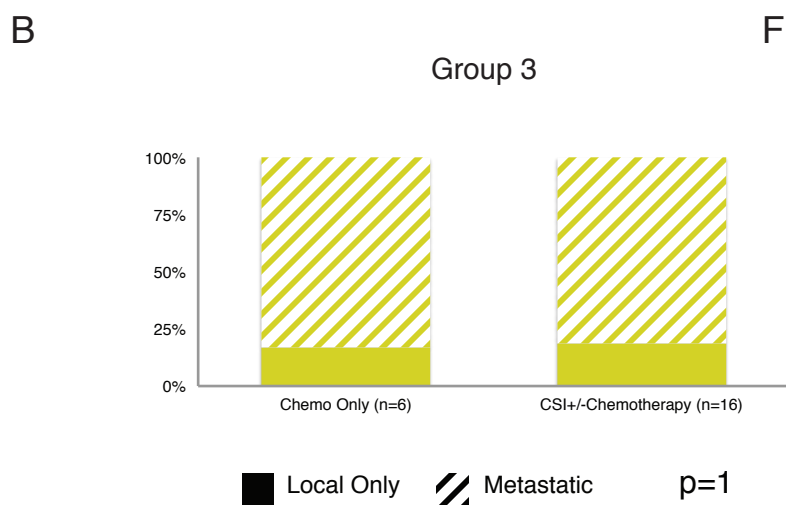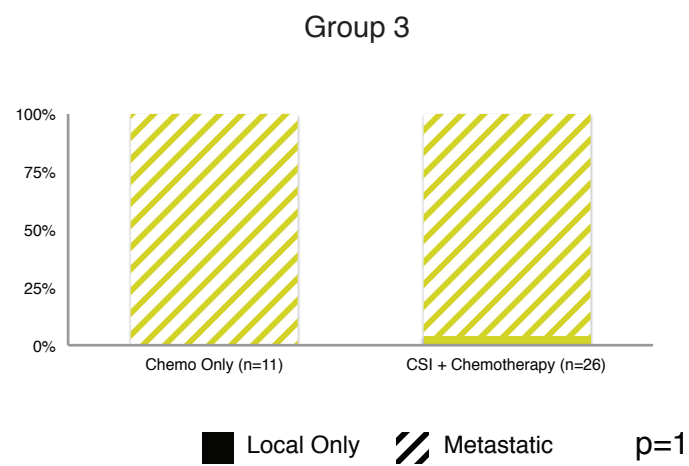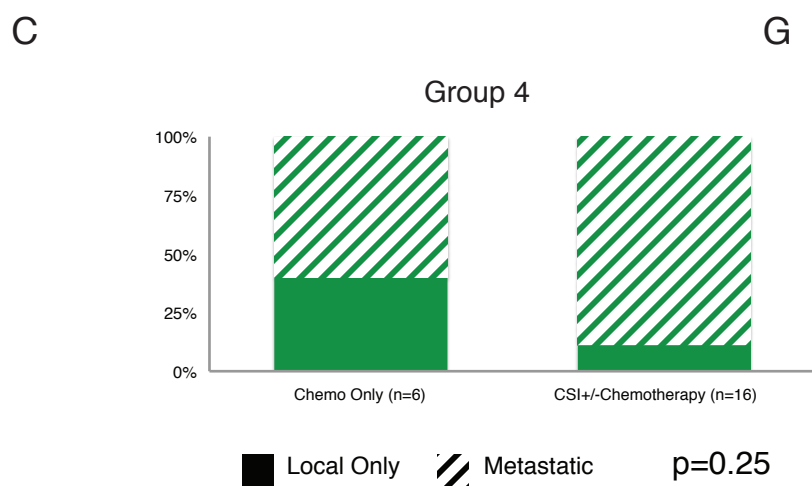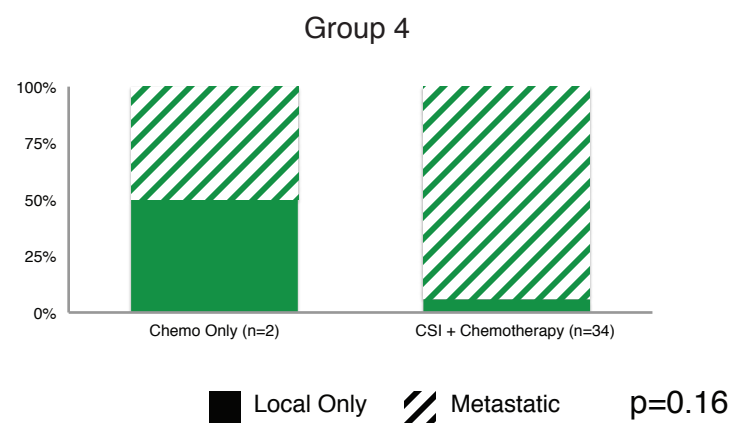

A

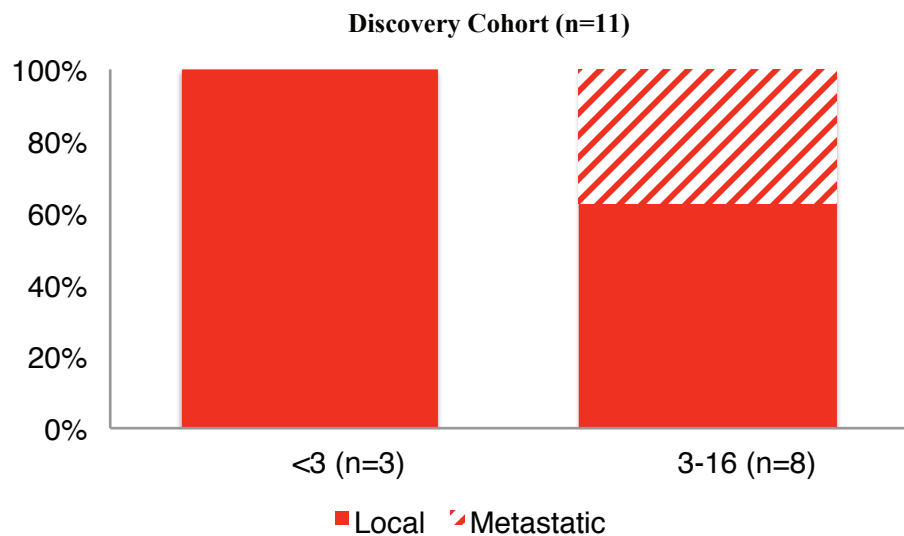

B

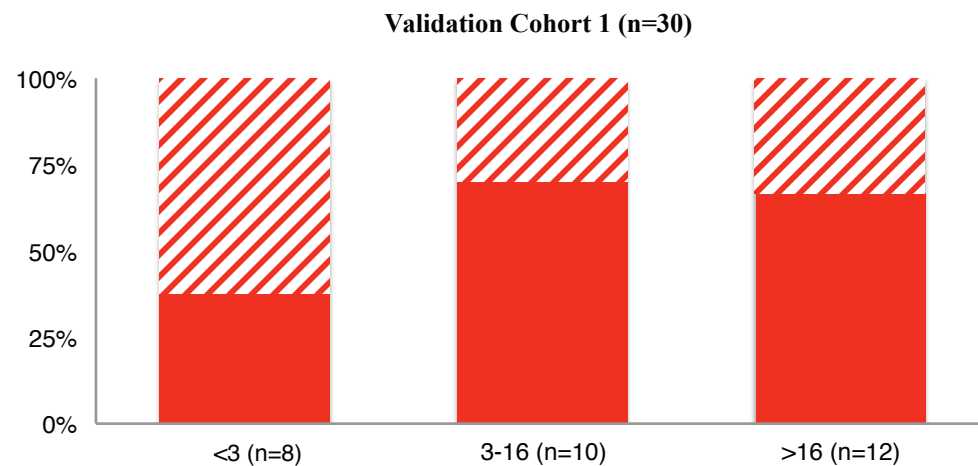

p=0.49

p=0.31

C

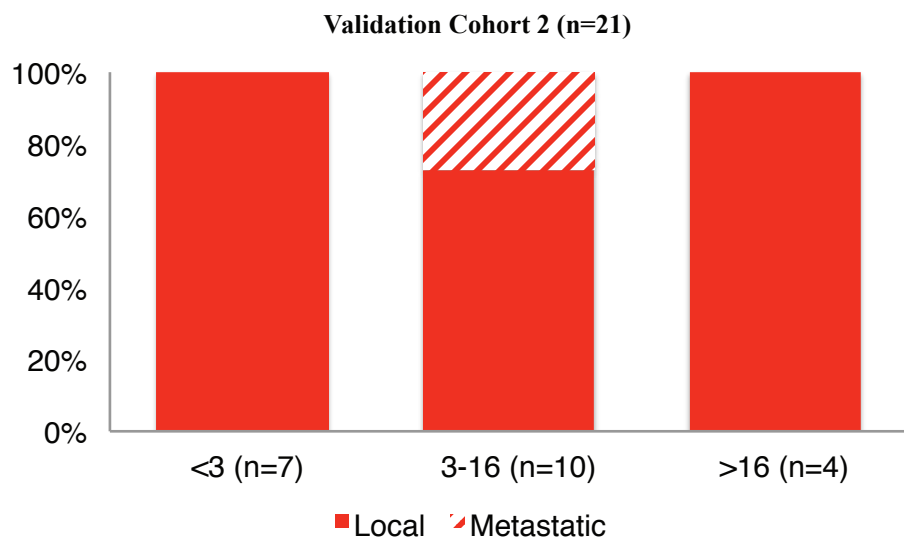

p=0.36

D

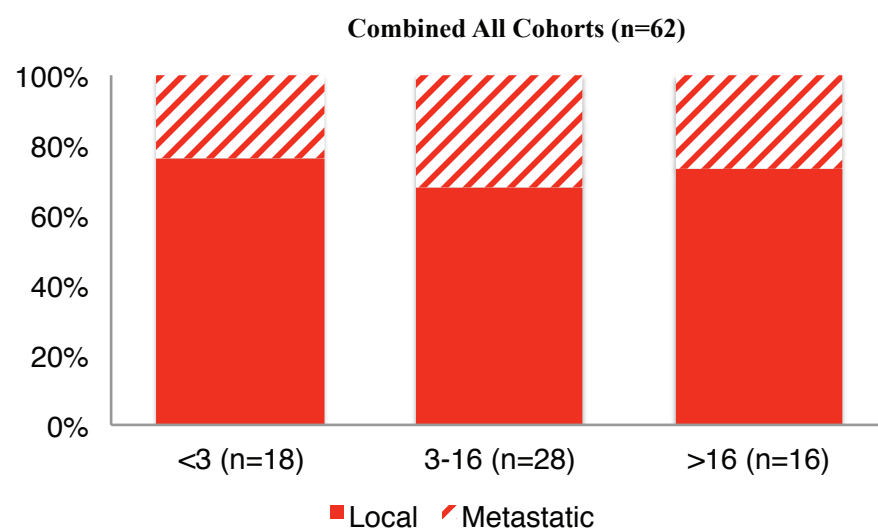

p=0.68
